# Supplementary material
Source: publisher site journal article supplement (https://www.dovepress.com/article/577857)
Supplement: Supplementary file 1 [file 577857%20Revised%20%09Supplementary%20Information.docx]

Table S1 Hyperparameter Settings for 6 Machine Learning Models.

| Models | Parameter 1 | Parameter 2 | Parameter 3 | Parameter 4 |
| --- | --- | --- | --- | --- |
| SVM | C: 1 | Gamma: scale | Kernel: rbf |  |
| XGBoost | Learning rate: 0.3 | Max depth: 3 | N estimators: 200 | Subsample: 0.8 |
| LightGBM | Boostingtype: dart | Learning rate: 0.3 | N estimators: 100 | Num leaves: 31 |
| Logistic Regression | C: 1 | Penalty: l2 | solver: lbfgs |  |
| Random Forest | Max depth: None | Min samples spli: 10 | N estimators: 50 |  |
| MLP | Hidden layer sizes: (50) | Learning rate init: 0.001 | max iter: 300 |  |

**Abbreviations:** SVM, support vector machine; XGBoost, extreme gradient boosting; LightGBM, light gradient boosting machine; MLP, multilayer perceptron.

Table S2 Clinical characteristics of test and train set

| Variables | Total  (n = 162) | Test set  (n = 47) | Train set  (n = 115) | p |
| --- | --- | --- | --- | --- |
| Infected, n (%) |  |  |  | 0.978 |
| no | 79 (48.8) | 23 (48.9) | 56 (48.7) |  |
| yes | 83 (51.2) | 24 (51.1) | 59 (51.3) |  |
| **Recipient** |  |  |  |  |
| Sex, n (%) |  |  |  | 0.244 |
| male | 99 (61.1) | 32 (68.1) | 67 (58.3) |  |
| female | 63 (38.9) | 15 (31.9) | 48 (41.7) |  |
| Age, year, Median (IQR) | 42.0 (33.2, 52.0) | 41.0 (34.0, 47.0) | 45.0 (33.0, 53.0) | 0.213 |
| Height, cm, Mean ± SD | 164.9 ± 8.0 | 164.3 ± 7.8 | 165.1 ± 8.1 | 0.589 |
| Weight, kg, Median (IQR) | 61.1 (53.0, 70.2) | 59.7 (51.5, 70.2) | 62.5 (53.7, 70.2) | 0.584 |
| BMI, kg/m2, Median (IQR) | 22.4 (20.0, 24.9) | 21.7 (19.4, 24.6) | 22.6 (20.2, 24.9) | 0.355 |
| Pretransplant anti-CMV IgG titer, IU/mL, Median (IQR) | 369.0 (170.0, 500.0) | 425.0 (246.0, 500.0) | 322.0 (160.0, 500.0) | 0.333 |
| PRA status, n (%) |  |  |  | 0.149 |
| positive | 24 (14.8) | 4 (8.5) | 20 (17.4) |  |
| negative | 138 (85.2) | 43 (91.5) | 95 (82.6) |  |
| Previous kidney transplant, n (%) |  |  |  | 0.78 |
| yes | 16 ( 9.9) | 5 (10.6) | 11 (9.6) |  |
| no | 146 (90.1) | 42 (89.4) | 104 (90.4) |  |
| CMV prevent strategy, n (%) |  |  |  | 0.391 |
| prophylaxis | 67 (41.4) | 17 (36.2) | 50 (43.5) |  |
| pre-emptive | 95 (58.6) | 30 (63.8) | 65 (56.5) |  |
| Dialysis modality, n (%) |  |  |  | 0.407 |
| PD | 35 (21.6) | 9 (19.1) | 26 (22.6) |  |
| HD | 122 (75.3) | 36 (76.6) | 86 (74.8) |  |
| PD and HD | 3 ( 1.9) | 2 (4.3) | 1 (0.9) |  |
| Pre-emptive | 2 ( 1.2) | 0 (0) | 2 (1.7) |  |
| **Donor** |  |  |  |  |
| Sex, n (%) |  |  |  | 0.721 |
| male | 93 (57.4) | 28 (59.6) | 65 (56.5) |  |
| female | 69 (42.6) | 19 (40.4) | 50 (43.5) |  |
| Age, year, Median (IQR) | 49.0 (37.0, 56.0) | 47.0 (33.5, 53.0) | 49.0 (40.0, 56.0) | 0.242 |
| Height, cm, Median (IQR) | 165.0 (159.0, 170.0) | 168.0 (160.0, 170.0) | 165.0 (158.0, 170.0) | 0.418 |
| Weight, kg, Median (IQR) | 63.2 (57.2, 70.0) | 63.5 (58.1, 69.5) | 63.0 (56.6, 70.0) | 0.772 |
| BMI, kg/m2, Mean ± SD | 23.1 ± 3.0 | 22.9 ± 2.7 | 23.1 ± 3.1 | 0.688 |
| Scr, μmol/L, Median (IQR) | 108.0 (70.2, 166.0) | 114.0 (71.5, 206.0) | 108.0 (68.0, 162.0) | 0.63 |
| Donor type, n (%) |  |  |  | 0.016 |
| DBD | 95 (58.6) | 25 (53.2) | 70 (60.9) |  |
| DCD | 22 (13.6) | 12 (25.5) | 10 (8.7) |  |
| LKD | 45 (27.8) | 10 (21.3) | 35 (30.4) |  |
| Transplantation |  |  |  |  |
| WIT, h, Median (IQR) | 0.0 (0.0, 2.0) | 0.0 (0.0, 3.9) | 0.0 (0.0, 1.9) | 0.116 |
| CIT, h, Median (IQR) | 10.0 (4.3, 13.4) | 11.0 (5.7, 16.2) | 9.7 (4.0, 12.8) | 0.08 |
| aPerioperative IV steroid dose, mg, Median (IQR) | 1875.0 (1750.0, 2405.0) | 1990.0 (1750.0, 2432.5) | 1870.0 (1750.0, 2327.5) | 0.558 |
| A mismatch, n (%) |  |  |  | 0.732 |
| 0 | 58 (35.8) | 19 (40.4) | 39 (33.9) |  |
| 1 | 86 (53.1) | 23 (48.9) | 63 (54.8) |  |
| 2 | 18 (11.1) | 5 (10.6) | 13 (11.3) |  |
| B mismatch, n (%) |  |  |  | 0.769 |
| 0 | 22 (13.6) | 5 (10.6) | 17 (14.8) |  |
| 1 | 85 (52.5) | 26 (55.3) | 59 (51.3) |  |
| 2 | 55 (34.0) | 16 (34) | 39 (33.9) |  |
| DRB1 mismatch, n (%) |  |  |  | 0.931 |
| 0 | 26 (16.0) | 8 (17) | 18 (15.7) |  |
| 1 | 95 (58.6) | 28 (59.6) | 67 (58.3) |  |
| 2 | 41 (25.3) | 11 (23.4) | 30 (26.1) |  |
| ABDR mismatch, n (%) |  |  |  | 0.722 |
| 0 | 5 ( 3.1) | 0 (0) | 5 (4.3) |  |
| 1 | 18 (11.1) | 6 (12.8) | 12 (10.4) |  |
| 2 | 30 (18.5) | 11 (23.4) | 19 (16.5) |  |
| 3 | 46 (28.4) | 12 (25.5) | 34 (29.6) |  |
| 4 | 40 (24.7) | 13 (27.7) | 27 (23.5) |  |
| 5 | 19 (11.7) | 4 (8.5) | 15 (13) |  |
| 6 | 4 ( 2.5) | 1 (2.1) | 3 (2.6) |  |
| Induced therapy, n (%) |  |  |  | 0.363 |
| ATG | 117 (72.2) | 34 (72.3) | 83 (72.2) |  |
| BX | 37 (22.8) | 9 (19.1) | 28 (24.3) |  |
| none | 8 ( 4.9) | 4 (8.5) | 4 (3.5) |  |
| ᵇ Laboratory variables around day 30 and clinical event |  |  |  |  |
| BK infected, n (%) |  |  |  | 0.525 |
| 0 | 149 (92.0) | 42 (89.4) | 107 (93) |  |
| 1 | 13 ( 8.0) | 5 (10.6) | 8 (7) |  |
| Rejection before CR, n (%) |  |  |  | 0.628 |
| 0 | 157 (96.9) | 45 (95.7) | 112 (97.4) |  |
| 1 | 5 ( 3.1) | 2 (4.3) | 3 (2.6) |  |
| DGF, n (%) |  |  |  | 0.54 |
| 0 | 129 (79.6) | 36 (76.6) | 93 (80.9) |  |
| 1 | 33 (20.4) | 11 (23.4) | 22 (19.1) |  |
| ᵇ Recipient's scr around d30, µmol/L, Median (IQR) | 142.5 (112.0, 183.0) | 141.0 (113.0, 207.0) | 143.0 (112.0, 177.5) | 0.567 |
| CD4+ count, /µL, Median (IQR) | 383.0 (179.2, 713.2) | 389.0 (176.0, 603.0) | 382.0 (185.5, 741.0) | 0.575 |
| CD8+ count, /µL, Median (IQR) | 298.0 (178.0, 485.8) | 329.0 (184.0, 511.0) | 297.0 (181.0, 458.5) | 0.538 |
| CD4+/CD8+ ratio, Median (IQR) | 1.3 (0.8, 1.9) | 1.1 (0.7, 1.5) | 1.3 (0.8, 2.0) | 0.104 |
| CD4+CD27- count /µL, Median (IQR) | 35.0 (18.2, 63.0) | 33.0 (16.0, 67.5) | 35.0 (19.0, 62.0) | 0.833 |
| CD4+CD28- count, /µL, Median (IQR) | 10.0 (4.0, 40.0) | 8.0 (3.0, 36.0) | 10.0 (4.0, 40.0) | 0.381 |
| CD8+CD27- count /µL, Median (IQR) | 54.5 (26.0, 103.0) | 62.0 (18.5, 138.5) | 54.0 (28.0, 98.0) | 0.638 |
| CD8+CD28- count /µL, Median (IQR) | 71.5 (29.2, 127.2) | 82.0 (19.5, 160.5) | 71.0 (33.0, 116.0) | 0.903 |

Continuous variables: values are expressed as Median (IQR) (for non‑normally distributed variables) or Mean ± SD (for normally distributed variables); Categorical variables: values are expressed as n (%)

**Abbreviations:** BMI, body mass index; CMV, cytomegalovirus; Pre-Tx, pre-transplant; IgG, immunoglobulin G; PRA, panel reactive antibody; PD, peritoneal dialysis; HD, hemodialysis; BKV, BK virus; DGF, delayed graft function; DBD, donation after brain death; DCD, donation after circulatory death; LKD, living kidney donor; WIT, warm ischemia time; CIT, cold ischemia time; ATG, anti-thymocyte globulin; BX, basiliximab; HLA, human leukocyte antigen; CD, cluster of differentiation

Note: ᵃ "Perioperative" was defined as from transplantation to hospital discharge; total IV steroid dose indicates cumulative intravenous methylprednisolone (Solu-Medrol) dose (mg); ᵇ "day 30 or d30 "was defined as within 30 ± 7 days after transplantation.

Table S3 Generalized Variance Inflation Factor (GVIF) for Each Predictor

| Predictors | GVIF | Df |
| --- | --- | --- |
| Prevention strategy | 1.123981 | 1 |
| CD4+count | 2.394778 | 1 |
| CD8+count | 1.913516 | 1 |
| CD4+CD27-count | 1.866397 | 1 |
| Recipient age | 1.431068 | 1 |
| CIT | 1.727324 | 1 |
| Donor resource | 1.998486 | 2 |

**Abbreviations:** CIT, Cold Ischemia Time; CD, Cluster of Differentiation; GVIF, generalized variance inflation factor; Df, degrees of freedom.
